# Supplementary material for: Biallelic CYP24A1 variants presenting during pregnancy: clinical and biochemical phenotypes
Source: PubMed Central journal article supplement — Endocr Connect. 2020 May 6;9(6):530–41. doi: 10.1530/EC-20-0150 (PMC7354719; doi:10.1530/ec-20-0150), 2020-05-06
Supplement: supplementary_figure_1.pdf [file supplementary_figure_1.pdf]

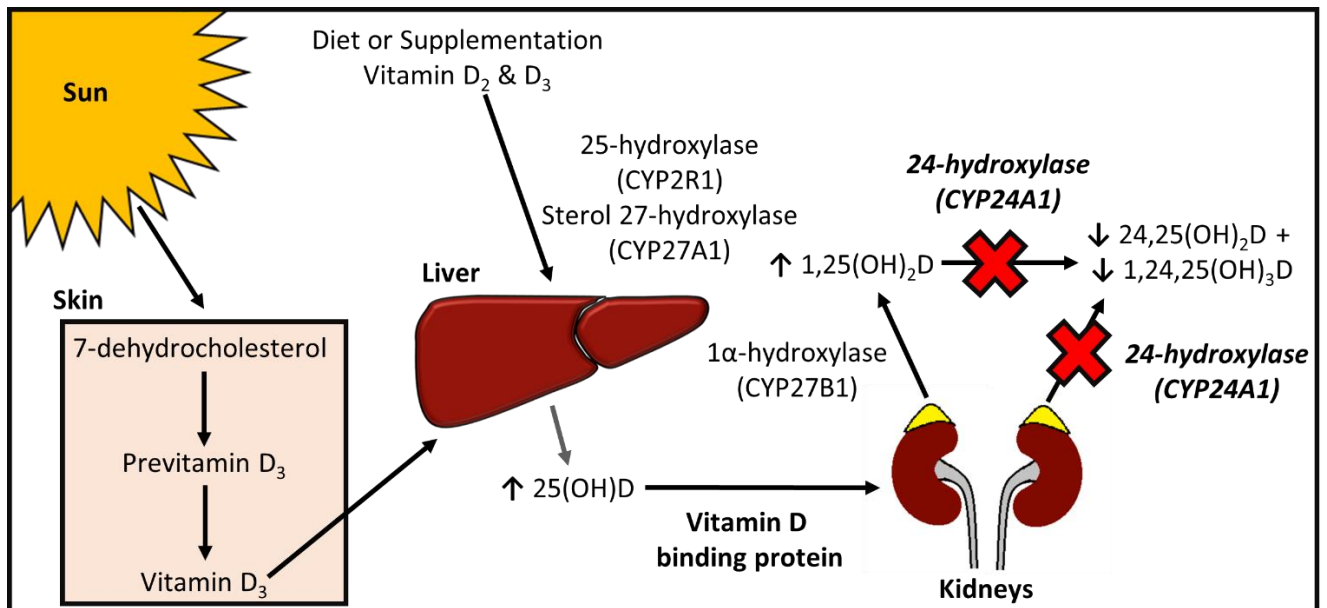

**Supplemental Figure 1:** Vitamin D metabolism in the presence of a *CYP24A1* mutation.

Adapted with permission from Griffin TP *et al* [48].
